# Supplementary material for: Comprehensive analysis of aberrantly expressed profiles of lncRNAs and miRNAs with associated ceRNA network in muscle-invasive bladder cancer
Source: PubMed Central journal article supplement (PMC5349905; doi:10.18632/oncotarget.13363), 2016-11-15
Supplement: oncotarget-07-86174-s001.pdf [file oncotarget-07-86174-s001.pdf]

## Comprehensive analysis of aberrantly expressed profiles of lncRNAs and miRNAs with associated ceRNA network in muscle-invasive bladder cancer

### Supplementary Materials

**Supplementary Table S1: The list of RNAs whose expressions were dysregulated in muscle-invasive bladder cancer.** See Supplementary\_Table\_S1.

**Supplementary Table S2: The list of 27 DERNA s that were involved in cell cycle pathway**

| Gene_Name | Fold_Change <sup>1</sup> | Involve in ceRNA network | Interacted_DEmiRNA | Interacted_DElncRNA |
|-----------|--------------------------|--------------------------|--------------------|---------------------|
| BUB1      | 3.42                     | No                       | N/A                | N/A                 |
| BUB1B     | 4.23                     | No                       | N/A                | N/A                 |
| CCNA2     | 3.50                     | No                       | N/A                | N/A                 |
| CCNB1     | 3.87                     | No                       | N/A                | N/A                 |
| CCNB2     | 4.26                     | No                       | N/A                | N/A                 |
| CCNE1     | 4.93                     | No                       | N/A                | N/A                 |
| CCNE2     | 4.75                     | No                       | N/A                | N/A                 |
| CDC20     | 5.41                     | No                       | N/A                | N/A                 |
| CDC25A    | 3.24                     | Yes                      | hsa-mir-141        | NBLA00301           |
| CDC45     | 4.68                     | No                       | N/A                | N/A                 |
| CDC6      | 4.12                     | No                       | N/A                | N/A                 |
| CDK1      | 4.98                     | No                       | N/A                | N/A                 |
| CDKN2A    | 17.84                    | No                       | N/A                | N/A                 |
| E2F1      | 3.50                     | No                       | N/A                | N/A                 |
| MAD2L1    | 3.42                     | No                       | N/A                | N/A                 |
| MCM2      | 3.61                     | No                       | N/A                | N/A                 |
| ORC1      | 4.62                     | No                       | N/A                | N/A                 |
| ORC6      | 4.43                     | No                       | N/A                | N/A                 |
| PKMYT1    | 3.46                     | No                       | N/A                | N/A                 |
| PLK1      | 4.84                     | No                       | N/A                | N/A                 |
| TTK       | 4.83                     | No                       | N/A                | N/A                 |
| ABL1      | 0.31                     | Yes                      | hsa-mir-30a        | NBLA00301           |
| CCND2     | 0.28                     | No                       | N/A                | N/A                 |
| CDKN1A    | 0.33                     | Yes                      | hsa-mir-93         | C20orf166-AS1       |
| GADD45B   | 0.15                     | No                       | N/A                | N/A                 |
| MYC       | 0.31                     | Yes                      | hsa-mir-145        | AATBC               |
| WEE1      | 0.29                     | No                       | N/A                | N/A                 |

1: Tumor vs. Normal. N/A: Not applicable.
